# Supplementary material for: High performance piezocomposites for flexible device application
Source: Royal Society of Chemistry journal article supplement (doi:10.1039/d0nr00111b), 2020-01-01
Supplement: d0nr00111b1.pdf [file d0nr00111b1.pdf]

## Electronic supplementary materials:

**Fig. S1 The diagram of experimental setup.**

**Fig. S2 SEM images of the BCZT/PDMS composites with different DEP time: (a)** 0 h, (b) 6 h, (c) 12 h, (d) 18 h, (e) 24 h and (f) 30 h; SEM images of the BCZT/PDMS composites **with different DEP time** after adjusting brightness and contrast : **(g)** 0 h, (h) 6 h, (i) 12 h, (j) 18 h, (k) 24 h and (l) 30 h; the optimal ellipses (red part) fitting to the regions of BCZT particles of the BCZT/PDMS composites images with different **DEP time: (m)** 0 h, (n) 6 h, (o) 12 h, (p) 18 h, (q) 24 h and (r) 30 h.

**Fig. S3 (a)** Poling electric field, **(b)** poling temperature, and **(d)** poling time dependence of the  $d_{33}$  value of BCZT/PDMS piezocomposites prepared by 24 h DEP time; **(c) Polarization–electric field ( $P$ – $E$ ) hysteresis loops for BCZT/PDMS piezocomposite prepared by 24 h DEP measured at different temperatures.**

Table S1. The fundamental electromechanical properties of the modeling the composites.

Table S2. Correspondence between feedback information and pressing position.

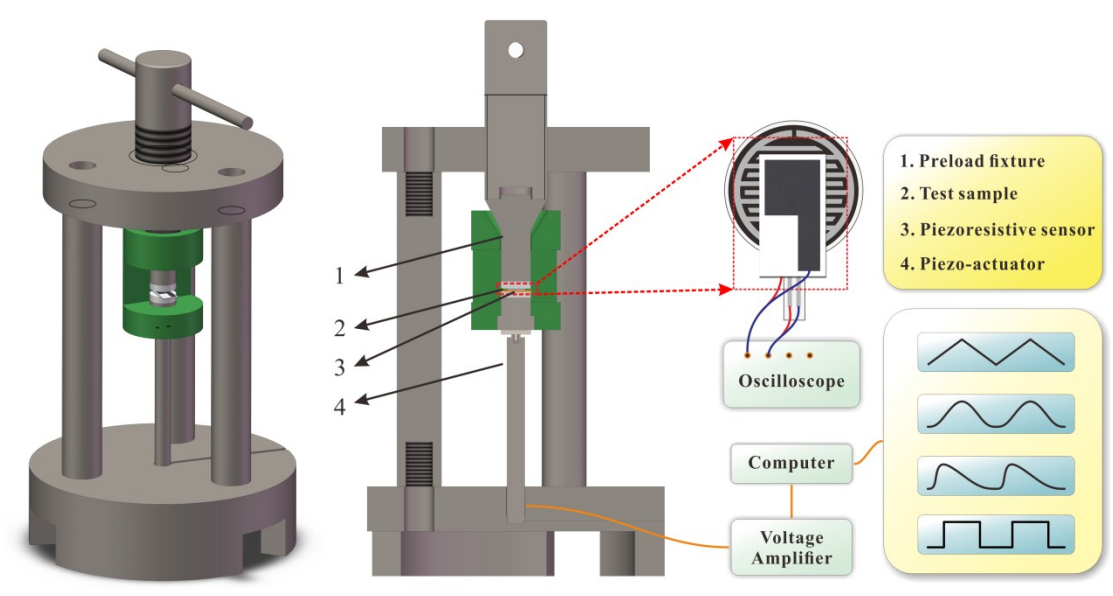

FIG. S1

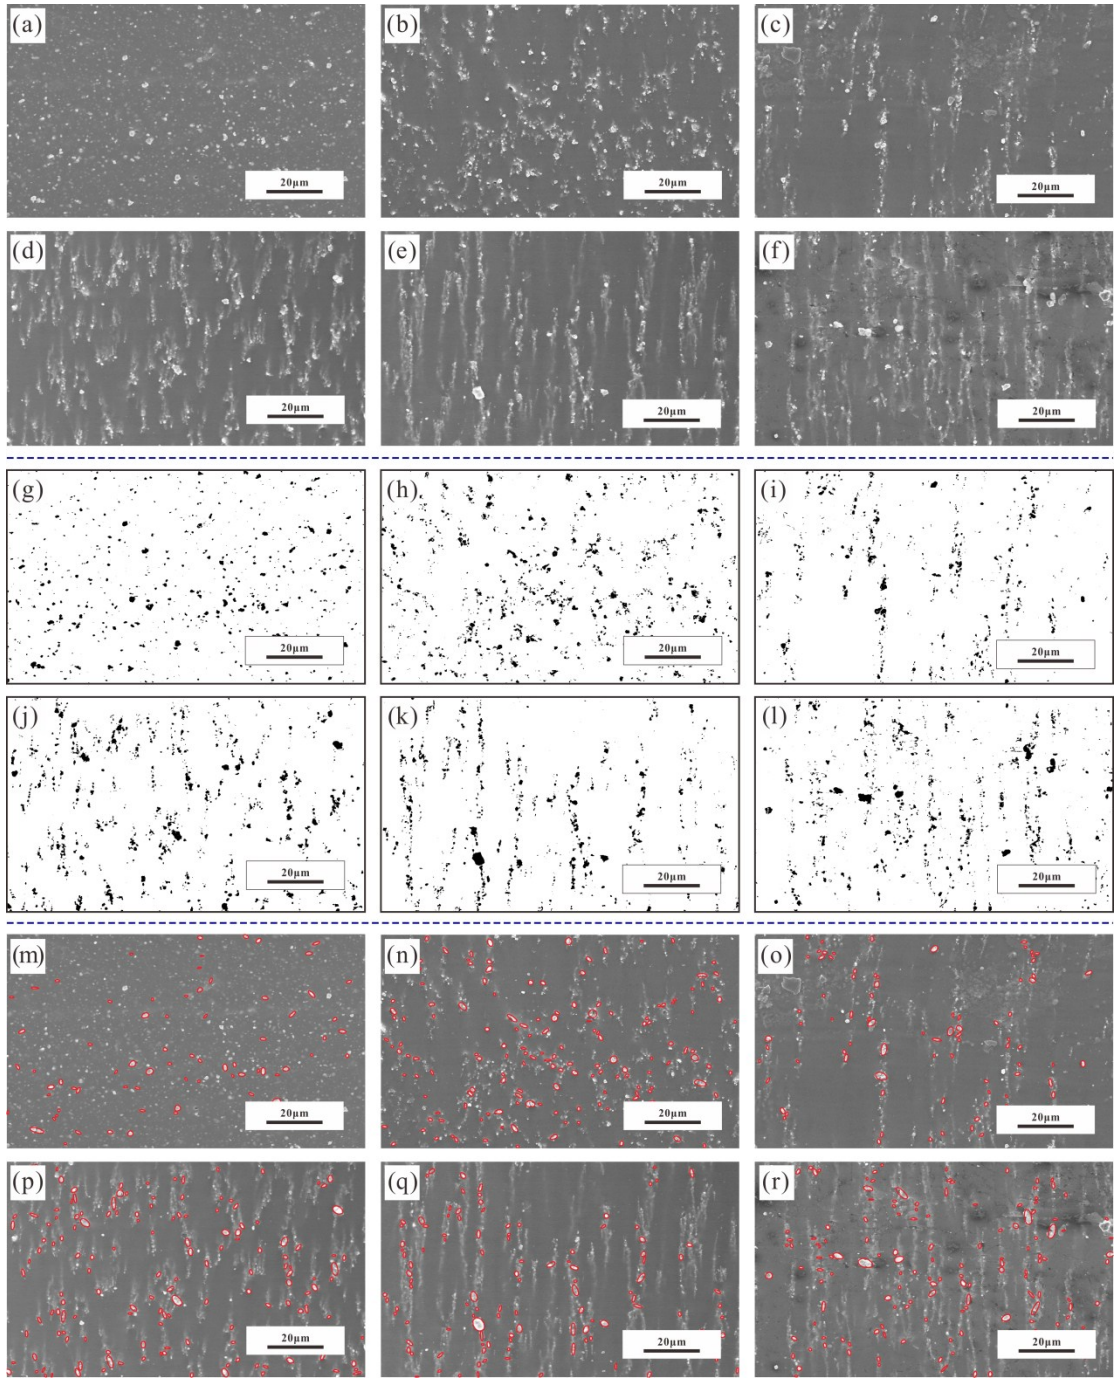

FIG. S2

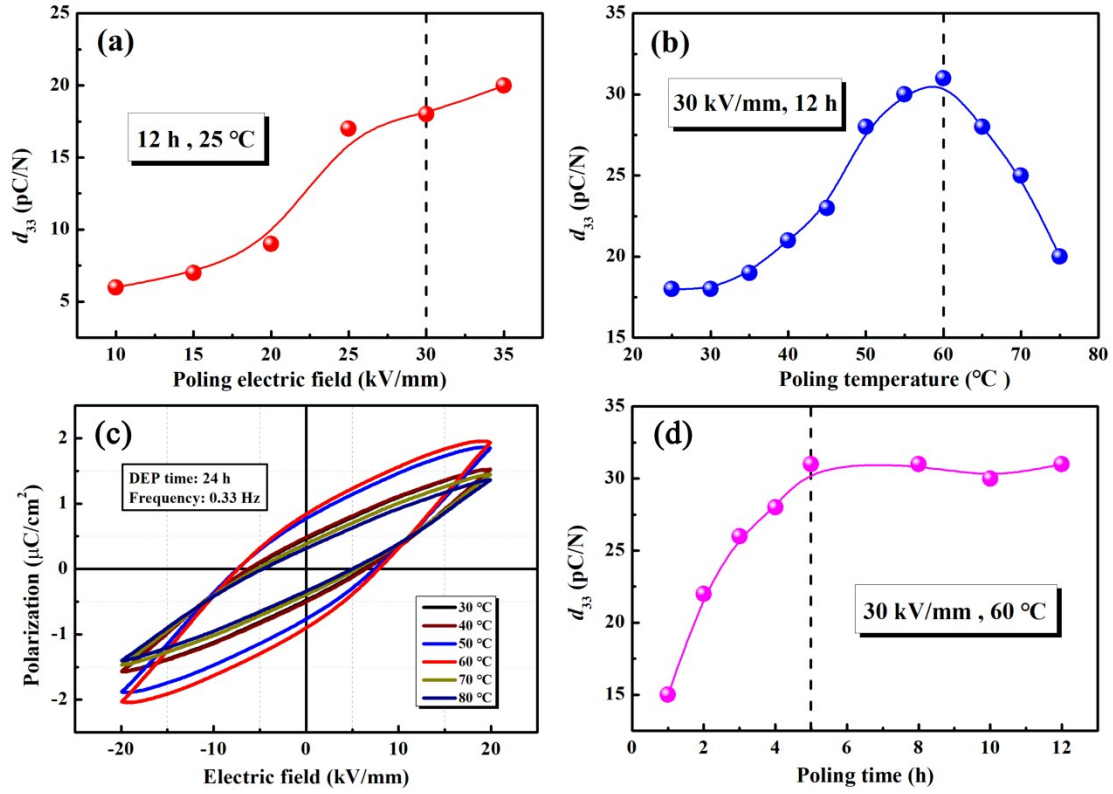

FIG. S3

Table S1. The fundamental electromechanical properties of the modeling the composites.

| Mechanical                            |                             |                    |       | Piezoelectric |          |          |                            |                            |
|---------------------------------------|-----------------------------|--------------------|-------|---------------|----------|----------|----------------------------|----------------------------|
| Density<br>( $\text{kg}/\text{m}^3$ ) | Young's<br>modulus<br>(MPa) | Poisson<br>ratio   |       | $d_{31}$      | $d_{33}$ | $d_{15}$ | $\epsilon_{11}/\epsilon_0$ | $\epsilon_{33}/\epsilon_0$ |
|                                       |                             |                    |       | pC/N          |          |          |                            |                            |
| BT                                    | 5700                        | $1.93 \times 10^5$ | 0.231 | 78            | 190      | 260      | 1450                       | 1700                       |
| PDMS                                  | 970                         | 1.5                | 0.48  | 0             | 0        | 0        | 5.84                       | 5.84                       |

Table S2 Correspondence between feedback information and pressing position

| <b>Feedback</b> | <b>Pressed position</b> | <b>Feedback</b> | <b>Pressed position</b> |
|-----------------|-------------------------|-----------------|-------------------------|
| 000000          | No press                | 010010          | 5                       |
| 100100          | 1                       | 001010          | 6                       |
| 010100          | 2                       | 100001          | 7                       |
| 001100          | 3                       | 010001          | 8                       |
| 100010          | 4                       | 001001          | 9                       |
